# Supplementary material for: Impact of linker functionalization on the adsorption of nitrogen-containing compounds in HKUST-1
Source: Royal Society of Chemistry journal article supplement (doi:10.1039/d0dt02165b), 2020-01-01
Supplement: d0dt02165b1.pdf [file d0dt02165b1.pdf]

## Impact of linker functionalization on the adsorption of nitrogen-containing compounds in HKUST-1

**Shibiao Zong<sup>a</sup>, Simin Huang<sup>a</sup>, Xue-Rong Shi<sup>a\*</sup>, Chunyan Sun<sup>a</sup>, Shusheng Xu<sup>a</sup>, Pan Ma<sup>a</sup>, Jianguo Wang<sup>b</sup>**

a: School of Material Engineering, Shanghai University of Engineering Science, 333 Longteng Road, Songjiang District, Shanghai, China;

b: State Key Laboratory of Coal Conversion, Institute of Coal Chemistry, Chinese Academy of Sciences, P.O. Box 165, Taiyuan 030001, China

Email: [shixuer05@mails.ucas.ac.cn](mailto:shixuer05@mails.ucas.ac.cn) (X. Shi)

### Content

|                                                                                           |   |
|-------------------------------------------------------------------------------------------|---|
| 1. The topologies of <b>fmj</b> , <b>tbo</b> and <b>pto</b> .....                         | 2 |
| 2. Adsorption Structures.....                                                             | 3 |
| 3. Adsorption energy of CO <sub>2</sub> , CH <sub>4</sub> , and H <sub>2</sub> O.....     | 7 |
| 4. Electron density difference map for CH <sub>3</sub> -functionalized HKUST-1 system.... | 7 |
| 5. Electron localization function for furan C <sub>4</sub> H <sub>4</sub> O.....          | 7 |

## 1. fmj, tbo, tpo topology

### (a) fmj topology

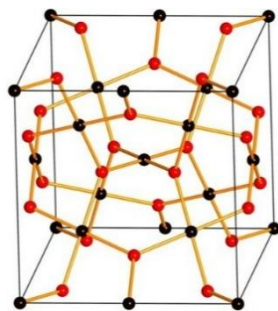

Figure S1. fmj topology

RCSR reference: <http://rcsr.net/nets/fmj>

- names: 3S net
- key words: bipartite

embed type: 1b

space group: Immm (orthorhombic)

vertices: 5

edges: 4

### (b) tbo topology

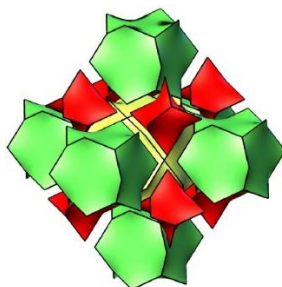

Figure S2. tbo topology

RCSR reference: <http://rcsr.net/nets/tbo>

- names: twisted boracite, 3S net, HKUST-1
- key words: bipartite, good
- references: Acta Cryst. A62, 350-355 (2006)

embed type: 1b

space group: Fm-3m (cubic)

vertices: 2

edges: 1

### (c) pto topology

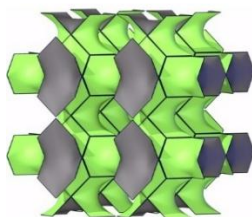

Figure S3. pto topology

RCSR reference: <http://rcsr.net/nets/pto>

- names: Pt<sub>3</sub>O<sub>4</sub>, 3S net
- key words: bipartite, good
- references: Acta Cryst. A62, 350-355 (2006)

embed type: 1a

space group: Pm-3n (cubic)

vertices: 2

edges: 1

## 2. Adsorption Structures

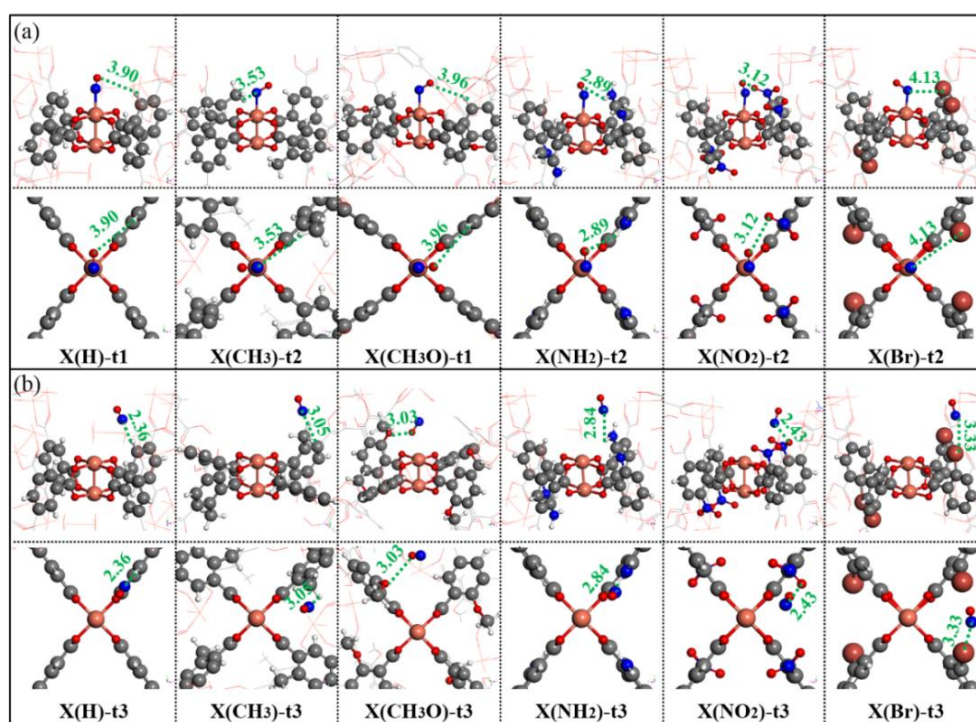

**Figure S4.** Top (upper row) and side (down row) views of the most favorable NO adsorption configuration on (a) open metal site, and (b) functional group site of pristine and X-functionalized HKUST-1. The shortest distance between the adsorbates and functional group are provided, in Å. Largest: Br; second-largest spheres: Cu. White, red, blue, and grey spheres with increasing size: H, O, N, and C, the same below.

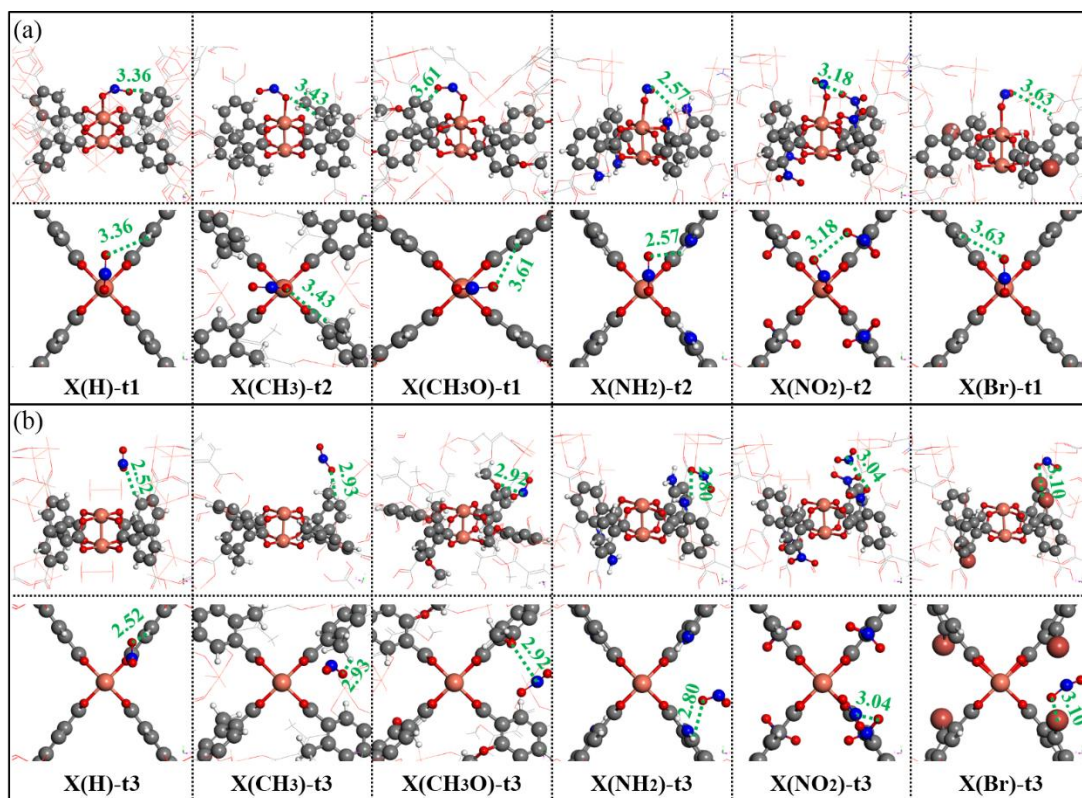

**Figure S5.** Top (upper row) and side (down row) views of the most favorable NO<sub>2</sub> adsorption configuration on the (a) open metal site, and (b) functional group site of the pristine and X-functionalized HKUST-1.

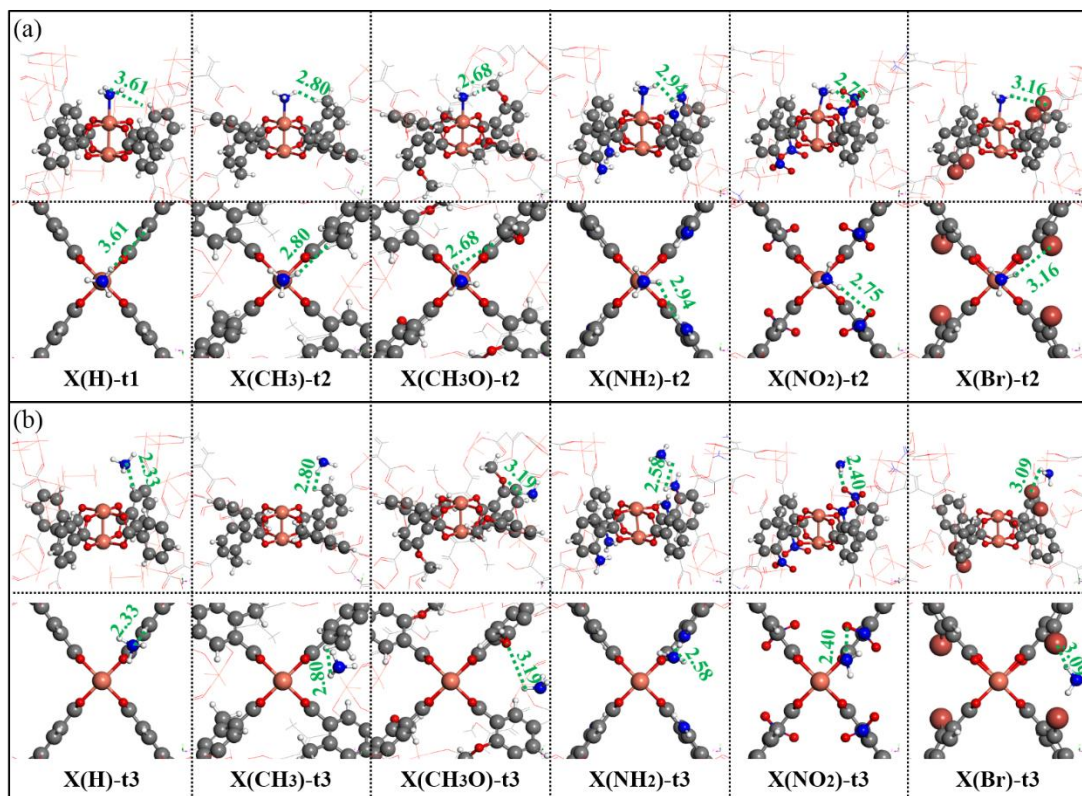

**Figure S6.** Top (upper row) and side (down row) views of the most favorable NH<sub>3</sub>

adsorption configuration on (a) open metal site, and (b) functional group site of pristine and X-functionalized HKUST-1.

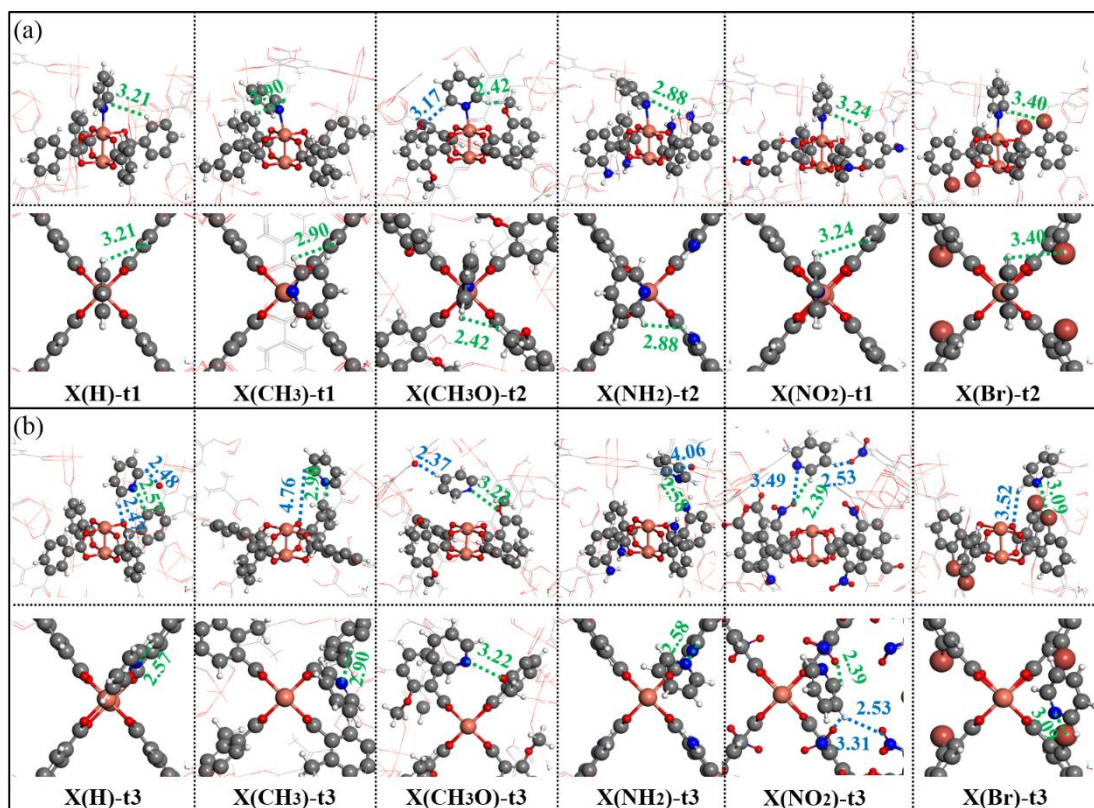

**Figure S7.** Top (upper row) and side (down row) views of the most favorable pyridine  $C_5H_5N$  adsorption configuration on the (a) open metal site, and (b) functional group site of pristine and X-functionalized HKUST-1.

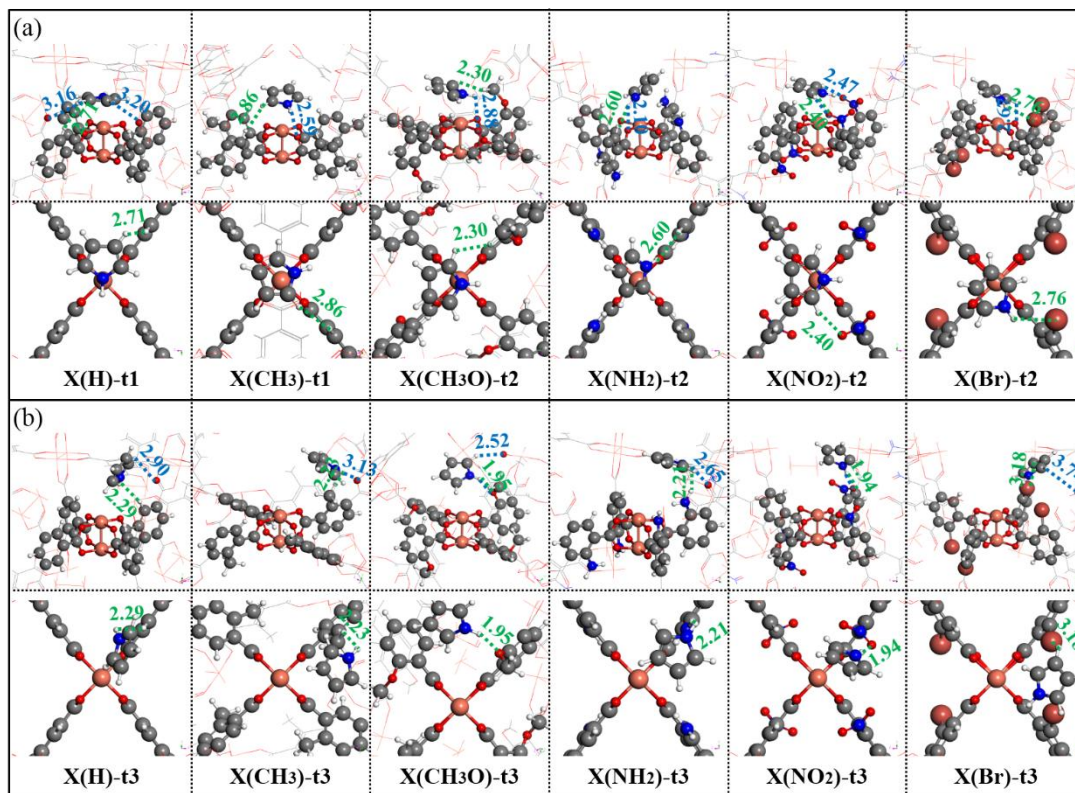

**Figure S8.** Top (upper row) and side (down row) views of the most favorable pyrrole  $C_4H_5N$  adsorption configuration on the (a) open metal site, and (b) functional group site of the pristine and X-functionalized HKUST-1.

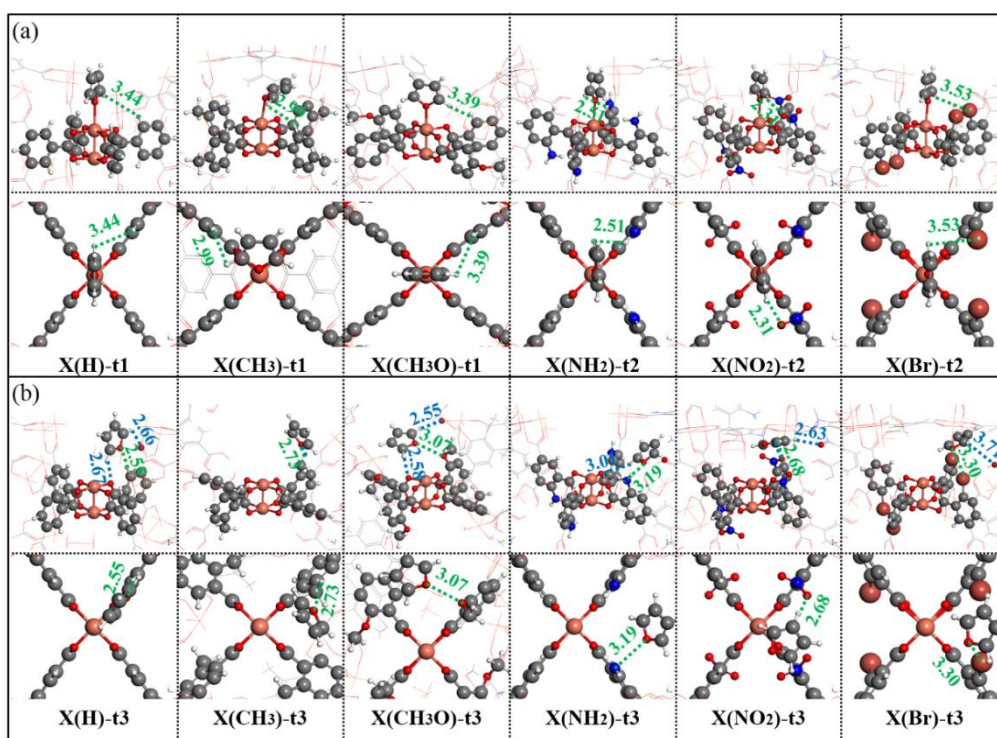

**Figure S9.** Top (upper row) and side (down row) views of most favorable  $C_4H_4O$  adsorption configuration on the (a) open metal site, and (b) functional group site of

pristine and X-functionalized HKUST-1.

### 3. Adsorption energy of CO<sub>2</sub>, CH<sub>4</sub>, and H<sub>2</sub>O

Table S1. Adsorption energies ( $E_{\text{ads}}$ , in kJ mol<sup>-1</sup>) of the most stable adsorption configuration of each species on the pristine (X = H) and X-functionalized (X = CH<sub>3</sub>- or CH<sub>3</sub>O) HKUST-1.

| X                 | CO <sub>2</sub> | CH <sub>4</sub> | H <sub>2</sub> O |
|-------------------|-----------------|-----------------|------------------|
| H                 | -51.2           | -53.7           | -61.1            |
| CH <sub>3</sub>   | -75.1(t3)       | -68.7(t2)       | -63.2(t1)        |
| CH <sub>3</sub> O | -59.6(t3)       | -73.4(t2)       | -117.1(t1)       |

### 4. Electron density difference map for CH<sub>3</sub>-functionalized HKUST-1 system.

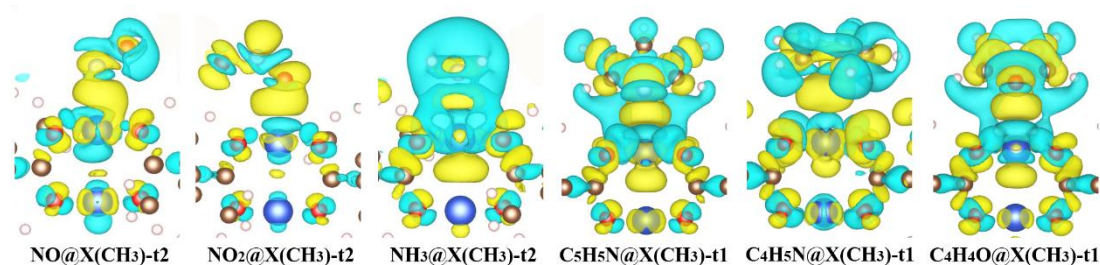

**Figure S10.** Electron density difference map for six adsorbates on open metal center (t1 or t2, only the more stable one is shown here) of CH<sub>3</sub>-functionalized HKUST-1. Accumulation region in yellow; depletion regions in blue.

### 5. Electron localization function for furan C<sub>4</sub>H<sub>4</sub>O

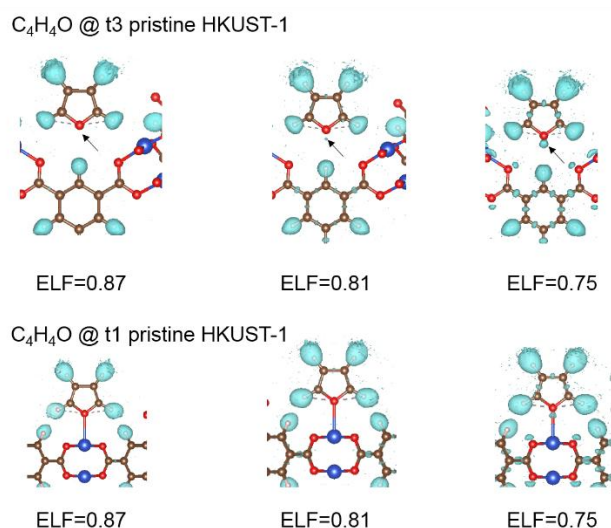

**Figure S11.** Electron localization function for furan C<sub>4</sub>H<sub>4</sub>O adsorption on t3 and t1 sites of pristine HKUST-1 at different iso-value.
